# Supplementary material
Source: PubMed Central journal article supplement (PMC4939088)
Supplement: NIHMS5516-supplement-Appendix_B.pdf [file NIHMS5516-supplement-Appendix_B.pdf]

## APPENDIX B

| Participant | Sex | Industry          | Job Category     | Sector  |
|-------------|-----|-------------------|------------------|---------|
| S 1         | F   | Health Services   | Nursing          | Public  |
| S2          | F   | Health Services   | Nursing          | Public  |
| S3          | F   | Health Services   | Nursing          | Public  |
| S4          | F   | Health Services   | Administration   | Public  |
| S5          | F   | Research          | Laboratory       | Public  |
| S6          | M   | Health Services   | Surgical Support | Public  |
| S7          | F   | Health Services   | Nursing          | Public  |
| S8          | F   | Health Services   | Nursing          | Public  |
| S9          | M   | Health Services   | Maintenance      | Public  |
| S10         | F   | Health Services   | Laboratory       | Public  |
| S11         | F   | Education         | Student Services | Public  |
| S12         | M   | Retail            | Sales            | Private |
| S13         | M   | Health Services   | Paramedical      | Public  |
| S14         | F   | Social Assistance | Housing Services | Public  |
| S15         | F   | Social Assistance | Transportation   | Private |
| S16         | M   | Retail            | Maintenance      | Private |
| S17         | M   | Research          | Laboratory       | Private |
| S18         | F   | Education         | Student Services | Public  |
| S19         | M   | Industrial        | Road Services    | Public  |
| S20         | M   | Industrial        | Operations       | Private |
| S21         | F   | Education         | Administration   | Public  |
| S22         | M   | Industrial        | Operations       | Private |
| S23         | M   | Health Services   | Paramedical      | Public  |
